1 **Limited accessibility of nitrogen supplied as amino acids, amides, and amines as energy**  
2 **sources for marine *Thaumarchaeota***

3

4 Julian Damashek<sup>1,5</sup>, Barbara Bayer<sup>2,6</sup>, Gerhard J. Herndl<sup>2,3</sup>, Natalie J. Wallsgrove<sup>4</sup>, Tamara  
5 Allen<sup>4</sup>, Brian N. Popp<sup>4</sup>, James T. Hollibaugh<sup>1</sup>

6

7 <sup>1</sup>Department of Marine Sciences, University of Georgia, Athens, GA, USA

8 <sup>2</sup>Department of Limnology and Bio-Oceanography, University of Vienna, Vienna, Austria

9 <sup>3</sup>Department of Marine Microbiology and Biogeochemistry, NIOZ, Royal Netherlands Institute  
10 for Sea Research, Utrecht University, Utrecht, The Netherlands

11 <sup>4</sup>Department of Geology and Geophysics, University of Hawai'i at Manoa, Honolulu, HI, USA

12 <sup>5</sup>Present address: Department of Biology, Utica College, Utica, NY, USA

13 <sup>6</sup>Present address: Department of Ecology, Evolution, and Marine Biology, University of  
14 California, Santa Barbara, CA

15 **Corresponding authors:**

16 Julian Damashek, 1600 Burrstone Road, Utica, NY 13502 • T: (315) 223-2326, F: (315) 792-  
17 3831 • [judamash@utica.edu](mailto:jdamash@utica.edu)

18 James T. Hollibaugh, 325 Sanford Drive, Athens, GA 30602 • T: (706) 542-7671, F: (706) 542-  
19 5888 • [aquadoc@uga.edu](mailto:aquadoc@uga.edu)

20 **Running title:** DON oxidation by marine *Thaumarchaeota*

21 **Keywords:** *Thaumarchaeota*, nitrification, dissolved organic nitrogen, polyamines, reactive  
22 oxygen species, archaea

23

24 **SUMMARY**

25 Genomic and physiological evidence from some strains of ammonia-oxidizing *Thaumarchaeota*  
26 demonstrate their additional ability to oxidize nitrogen (N) supplied as urea or cyanate, fueling  
27 conjecture about their ability to conserve energy by directly oxidizing reduced N from other  
28 dissolved organic nitrogen (DON) compounds. Similarly, field studies have shown rapid  
29 oxidation of polyamine-N in the ocean, but it is unclear whether *Thaumarchaeota* oxidize  
30 polyamine-N directly or whether heterotrophic DON remineralization is required. We tested  
31 growth of two marine *Nitrosopumilus* isolates on DON compounds including polyamines, amino  
32 acids, primary amines, and amides as their sole energy source. Though axenic cultures only  
33 consumed N supplied as ammonium or urea, there was rapid but inconsistent oxidation of N  
34 from the polyamine putrescine when cultures included a heterotrophic bacterium. Surprisingly,  
35 axenic cultures oxidized <sup>15</sup>N-putrescine during growth on ammonia, suggesting co-metabolism  
36 or accelerated breakdown of putrescine by reactive metabolic byproducts. Nitric oxide, hydrogen  
37 peroxide, or peroxydinitrite did not oxidize putrescine in sterile seawater. These data suggest that  
38 the N in common DON molecules is not directly accessible to marine *Thaumarchaeota*, with  
39 thaumarchaeal oxidation (and presumably assimilation) of DON-N requiring initial heterotrophic  
40 remineralization. However, reactive byproducts or enzymatic co-metabolism may facilitate  
41 limited thaumarchaeal DON-N oxidation.

## 42 INTRODUCTION

43 While chemoautotrophy supported by ammonia (NH<sub>3</sub>) oxidation is the primary  
44 metabolism of most *Thaumarchaeota* (Francis *et al.*, 2007; Stahl and de la Torre, 2012; Santoro  
45 *et al.*, 2019), there has also been speculation on their additional capacity to oxidize nitrogen (N)  
46 from a variety of dissolved organic nitrogen (DON) compounds. Numerous experiments have  
47 demonstrated that some *Thaumarchaeota* can grow via oxidation of N supplied as urea:  
48 following the discovery of urease and urea transporter genes in the sponge symbiont  
49 *Cenarchaeum symbiosum* (Hallam *et al.*, 2006), thaumarchaeal urease genes were documented  
50 throughout the ocean (Yakimov *et al.*, 2011; Alonso-Saez *et al.*, 2012; Smith *et al.*, 2016), rate  
51 measurements using <sup>15</sup>N tracers showed moderate urea-N oxidation in coastal waters (Tolar *et al.*  
52 *et al.*, 2017; Damashek *et al.*, 2019a; Kitzinger *et al.*, 2019; Laperriere *et al.*, 2021), and marine  
53 *Thaumarchaeota* capable of growth via stoichiometric oxidation of urea-N to nitrite (NO<sub>2</sub><sup>-</sup>) were  
54 isolated (Qin *et al.*, 2014; Bayer *et al.*, 2016; Carini *et al.*, 2018). In addition to urea, a  
55 thaumarchaeote isolated from a hot spring contains a cyanate hydratase gene (*cynS*) and can  
56 grow via oxidation of cyanate-N (Palatinszky *et al.*, 2015). Oxidation of both urea- and cyanate-  
57 N by *Thaumarchaeota* appears to drive NO<sub>2</sub><sup>-</sup> production in the northern Gulf of Mexico  
58 (Kitzinger *et al.*, 2019). These studies provide ample evidence of widespread thaumarchaeal  
59 oxidation of urea-N, and likely cyanate-N, throughout the ocean.

60 In addition to urea and cyanate, there is interest in whether *Thaumarchaeota* can directly  
61 oxidize N from other common DON compounds. Early studies of marine microbial assemblages  
62 demonstrated thaumarchaeal amino acid assimilation (Ouverney and Fuhrman, 2000; Teira *et al.*,  
63 2006; Kirchman *et al.*, 2007), and recent experiments in the coastal Pacific Ocean demonstrated  
64 assimilation of N but not carbon (C) from amino acids, prompting speculation about the ability

65 of *Thaumarchaeota* to oxidize amino acid-N directly (Dekas *et al.*, 2019). However, data on  
66 thaumarchaeal DON-N oxidation rates are scarce. <sup>15</sup>N-tracer experiments in the coastal South  
67 Atlantic Bight, where *Thaumarchaeota* are the dominant ammonia oxidizers (Hollibaugh *et al.*,  
68 2011; Hollibaugh *et al.* 2014; Tolar *et al.*, 2017; Liu *et al.*, 2018; Damashek *et al.*, 2019a), not  
69 only measured detectable oxidation of N supplied as urea and L-glutamic acid (L-GLU), but  
70 found oxidation rates of N from the polyamine putrescine (1,4-diaminobutane; PUT) to be far  
71 higher than oxidation rates of urea- or amino acid-N (Damashek *et al.*, 2019a). Polyamines  
72 consist of a reduced C backbone with at least two amine substitutions (Tabor and Tabor, 1984).  
73 Ubiquitously high intracellular concentrations (~mM) of polyamines such as PUT, spermine, and  
74 spermidine (Tabor and Tabor, 1985; Liu *et al.*, 2016) and rapid turnover rates in seawater (Lee  
75 and Jørgensen, 1995; Liu *et al.*, 2015) suggest fast microbial cycling of polyamines in the marine  
76 environment, including oxidation of polyamine-N (Damashek *et al.*, 2019a). However, it is  
77 unknown whether *Thaumarchaeota* can conserve energy by oxidizing polyamine- or amino acid-  
78 N directly, or if prior heterotrophic remineralization to ammonium (NH<sub>4</sub><sup>+</sup>) is required.

79 We tested the ability of two thaumarchaeal strains originally isolated from the northern  
80 Adriatic Sea (*Nitrosopumilus piranensis* D3C and *N. adriaticus* NF5; Bayer *et al.*, 2016; Bayer  
81 *et al.*, 2019a) to grow using a variety of DON compounds as sole energy sources. Given prior  
82 evidence of rapid PUT-N oxidation in the field, our primary focus was polyamines. Axenic  
83 thaumarchaeal cultures were unable to grow when supplied with single DON compounds, other  
84 than the expected growth on urea by *N. piranensis* D3C. However, experiments with <sup>15</sup>N-labeled  
85 compounds demonstrated that axenic cultures of both strains oxidized a significant amount of  
86 PUT-N when growing on NH<sub>3</sub>, suggesting PUT may be co-metabolized or broken down by  
87 reactive byproducts produced during thaumarchaeal growth. Furthermore, enrichment cultures

88 containing a heterotrophic bacterium occasionally showed rapid PUT-N oxidation, indicating an  
89 important role for heterotrophic DON remineralization in this process. Our data indicate that  
90 oxidation of reduced N by marine *Nitrosopumilaceae* is restricted to well-known substrates, but  
91 suggest breakdown of DON and oxidation of its liberated N may occur as an indirect effect of  
92 thaumarchaeal growth or due to tight coupling between DON remineralization by heterotrophs  
93 and subsequent thaumarchaeal oxidation of the resulting  $\text{NH}_4^+$ .

94

## 95 **RESULTS**

### 96 **GROWTH EXPERIMENTS**

97 Growth experiments were conducted with axenic cultures of *Nitrosopumilus* strains D3C  
98 and NF5 (Bayer *et al.*, 2019a) grown in  $\text{NH}_4^+$ -free Synthetic Crenarchaeota Medium (SCM;  
99 Könneke *et al.*, 2005) amended with a variety of single DON compounds (1 or 2 mM added N;  
100 Table 1) as their sole energy and N source. Small amounts of  $\text{NO}_2^-$  (10-50  $\mu\text{M}$ ) were linearly  
101 produced over 70 days in all treatments (including negative controls with no added  $\text{NH}_4^+$  or  
102 DON), presumably due to  $\text{NH}_4^+$  contamination or breakdown and oxidation of media  
103 components such as antibiotics. Both strains converted  $\text{NH}_3$  into  $\text{NO}_2^-$  stoichiometrically within  
104 7 days, and D3C converted urea-N into  $\text{NO}_2^-$  within ~14 days (Table 1; Fig. S1), consistent with  
105 previous data from these isolates (Bayer *et al.*, 2016; Bayer *et al.*, 2019a). A small fraction (20-  
106 30%) of the glutamine-N amendment in both strains was converted to  $\text{NO}_2^-$  linearly with time.  
107 None of the other DON amendments led to  $\text{NO}_2^-$  production (Table 1; Fig. S1).

**Table 1**  $\text{NO}_2^-$  produced (mean  $\pm$  standard deviation of triplicates) by axenic thaumarchaeal strains in media containing single organic N compounds as the sole energy source. Bolded text shows treatments with at least one isolate accumulating  $\text{NO}_2^-$  to a level greater than the negative control treatments.

| Substrate          | Amendment ( $\mu\text{M}$ ) | N Addition ( $\mu\text{M}$ ) | D3C                                        |                                   | NF5                                        |                                  |
|--------------------|-----------------------------|------------------------------|--------------------------------------------|-----------------------------------|--------------------------------------------|----------------------------------|
|                    |                             |                              | $\text{NO}_2^-$ Produced ( $\mu\text{M}$ ) | Available N Oxidized (%)          | $\text{NO}_2^-$ Produced ( $\mu\text{M}$ ) | Available N Oxidized (%)         |
| Ammonium           | 1000                        | 1000                         | <b>951.8 <math>\pm</math> 10.4</b>         | <b>95.2 <math>\pm</math> 1.0</b>  | <b>982.1 <math>\pm</math> 19.3</b>         | <b>98.2 <math>\pm</math> 1.9</b> |
| Urea               | 500                         | 1000                         | <b>1034.5 <math>\pm</math> 16.9</b>        | <b>103.5 <math>\pm</math> 1.7</b> | 8.2 $\pm$ 7.0                              | 0.8 $\pm$ 0.7                    |
| 1,2-diaminoethane  | 500                         | 1000                         | 16.7 $\pm$ 4.1                             | 1.7 $\pm$ 0.4                     | 17.2 $\pm$ 1.4                             | 1.7 $\pm$ 0.1                    |
| 1,3-diaminopropane | 500                         | 1000                         | 23.4 $\pm$ 2.3                             | 2.3 $\pm$ 0.2                     | 23.4 $\pm$ 3.0                             | 2.3 $\pm$ 0.3                    |
| Putrescine         | 500                         | 1000                         | 43.9 $\pm$ 1.9                             | 4.4 $\pm$ 0.2                     | 16.0 $\pm$ 3.1                             | 1.6 $\pm$ 0.3                    |
| Cadaverine         | 500                         | 1000                         | 21.7 $\pm$ 1.2                             | 2.2 $\pm$ 0.1                     | 23.4 $\pm$ 2.2                             | 2.3 $\pm$ 0.2                    |
| 1,7-diaminoheptane | 500                         | 1000                         | 23.4 $\pm$ 0.6                             | 2.3 $\pm$ 0.1                     | 22.1 $\pm$ 0.8                             | 2.2 $\pm$ 0.1                    |
| Spermine           | 500                         | 2000                         | 48.3 $\pm$ 3                               | 2.4 $\pm$ 0.2                     | 23.9 $\pm$ 7.6                             | 1.2 $\pm$ 0.4                    |
| Spermidine         | 500                         | 1000                         | 45.9 $\pm$ 1.8                             | 4.6 $\pm$ 0.2                     | 13.7 $\pm$ 3.6                             | 1.4 $\pm$ 0.4                    |
| Methylamine        | 1000                        | 1000                         | 39.9 $\pm$ 1.8                             | 4.0 $\pm$ 0.2                     | 13.5 $\pm$ 3.8                             | 1.4 $\pm$ 0.4                    |
| L-Glutamate        | 1000                        | 1000                         | 43.9 $\pm$ 3                               | 4.4 $\pm$ 0.3                     | 13.0 $\pm$ 5.7                             | 1.3 $\pm$ 0.6                    |
| <b>L-Glutamine</b> | 500                         | 1000                         | <b>299.1 <math>\pm</math> 6.1</b>          | <b>29.9 <math>\pm</math> 0.6</b>  | <b>212.5 <math>\pm</math> 4.4</b>          | <b>21.3 <math>\pm</math> 0.4</b> |
| L-Arginine         | 500                         | 2000                         | 48.7 $\pm$ 3.1                             | 2.4 $\pm$ 0.2                     | 26.8 $\pm$ 0.7                             | 1.3 $\pm$ 0.0                    |
| L-Asparagine       | 500                         | 1000                         | 32.3 $\pm$ 2.5                             | 3.2 $\pm$ 0.3                     | 45.2 $\pm$ 2.1                             | 4.5 $\pm$ 0.2                    |
| L-Glycine          | 1000                        | 1000                         | 32.5 $\pm$ 2.8                             | 3.3 $\pm$ 0.3                     | 42.8 $\pm$ 1.4                             | 4.3 $\pm$ 0.1                    |
| L-Ornithine        | 500                         | 1000                         | 27.1 $\pm$ 2                               | 2.7 $\pm$ 0.2                     | 38.0 $\pm$ 1.3                             | 3.8 $\pm$ 0.1                    |
| Acetamide          | 1000                        | 1000                         | 28.2 $\pm$ 2.4                             | 2.8 $\pm$ 0.2                     | 41.2 $\pm$ 1.4                             | 4.1 $\pm$ 0.1                    |
| Formamide          | 1000                        | 1000                         | 45.1 $\pm$ 0.7                             | 4.5 $\pm$ 0.1                     | 52.8 $\pm$ 0.8                             | 5.3 $\pm$ 0.1                    |
| Nicotinamide       | 1000                        | 2000                         | 33.1 $\pm$ 2.3                             | 1.7 $\pm$ 0.1                     | 41.2 $\pm$ 1.8                             | 2.1 $\pm$ 0.1                    |
| Propionamide       | 1000                        | 1000                         | 34.7 $\pm$ 3.4                             | 3.5 $\pm$ 0.3                     | 37.9 $\pm$ 1.8                             | 3.8 $\pm$ 0.2                    |
| Butyramide         | 1000                        | 1000                         | 39.4 $\pm$ 5.4                             | 3.9 $\pm$ 0.5                     | 37.3 $\pm$ 4.9                             | 3.7 $\pm$ 0.5                    |
| Water              | 0                           | 0                            | 42.3 $\pm$ 3.4                             |                                   | 41.9 $\pm$ 2.4                             |                                  |

## 108 Further growth experiments

109 were conducted with enrichment  
 110 cultures of *Nitrosopumilus* strains  
 111 D3C and NF5 containing ~5-15%  
 112 bacterial 16S rRNA genes (Table  
 113 2) belonging to the heterotrophic  
 114 bacterium *Oceanicaulis alexandrii*  
 115 (Bayer *et al.*, 2016). Growth on  
 116  $\text{NH}_3$  or urea proceeded rapidly and  
 117 matched published rates (Bayer *et*  
 118 *al.*, 2016).  $\text{NO}_2^-$  accumulation  
 119 during growth of enrichments on

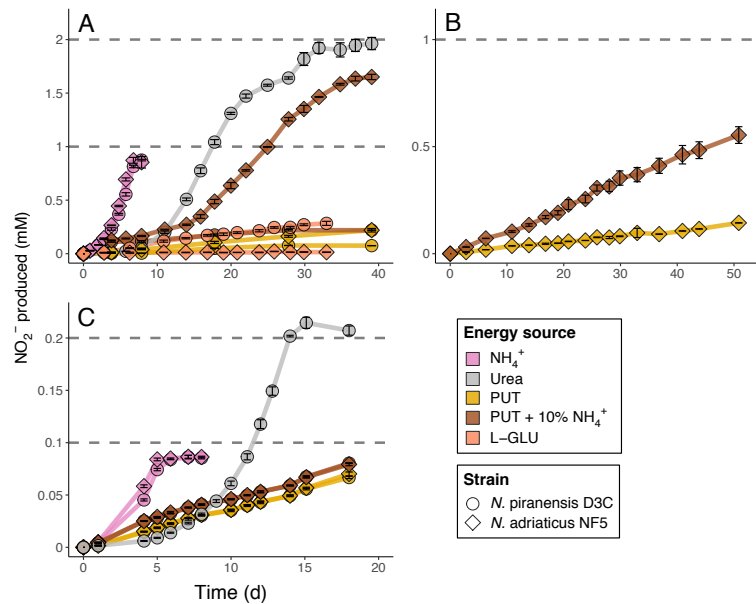

**Fig. 1**  $\text{NO}_2^-$  accumulation by enrichment cultures of *N. piranensis* D3C (circles) and *N. adriaticus* NF5 (diamonds) over time. Color denotes the compound included as sole energy source in media. Points show the average of triplicate incubation bottles while error bars show standard deviation. Dashed lines show maximal  $\text{NO}_2^-$  production given added N (two lines are present to show total added N when  $\text{NH}_4^+$  and urea were included). **A)** Growth with either 1 mM  $\text{NH}_4^+$ , 1 mM urea, 1 mM PUT, 1 mM PUT plus 100  $\mu\text{M}$   $\text{NH}_4^+$ , or 1 mM L-GLU. **B)** Growth with either 1 mM PUT or 1 mM PUT plus 100  $\mu\text{M}$   $\text{NH}_4^+$  (*N. adriaticus* NF5 only). **C)** Growth with either 100  $\mu\text{M}$   $\text{NH}_4^+$ , 100  $\mu\text{M}$  urea, 100  $\mu\text{M}$  PUT, or 100  $\mu\text{M}$  PUT plus 100  $\mu\text{M}$   $\text{NH}_4^+$ . Bacterial and thaumarchaeal 16S rRNA gene quantities for selected experiments (panels A, C) are shown in Table 2.

120 NH<sub>3</sub>-free SCM amended with either 500 μM PUT or 500 μM PUT + 50 μM NH<sub>4</sub><sup>+</sup> was often  
 121 linear and relatively slow (Fig. 1), but occasionally resembled a typical microbial growth curve  
 122 (e.g., *N. adriaticus* NF5 grown with PUT and NH<sub>4</sub><sup>+</sup> amendment; Fig. 1 A). During growth on  
 123 NH<sub>3</sub>, thaumarchaeal and bacterial 16S rRNA genes in selected treatments (those shown in Fig. 1  
 124 A, C) generally retained the same relative abundance as the respective inoculum (~90-95%  
 125 thaumarchaeal genes) and attained abundances comparable to the initial inoculum by the end of  
 126 the experiment (Table 2). Thaumarchaeal and bacterial genes gradually increased in treatments  
 127 containing PUT, with bacterial genes often reaching higher abundances than the initial inoculum  
 128 (Table 2). Nitrite concentration increased rapidly when *N. adriaticus* NF5 was amended with  
 129 PUT + NH<sub>4</sub><sup>+</sup> (Fig. 1 A). Both populations of genes increased in this treatment; notably, bacterial

130 genes increased from  
 131  $6.7 \times 10^6$  genes mL<sup>-1</sup> in  
 132 the inoculum (8.2% of  
 133 16S genes) to  $1.4 \times 10^8$  genes mL<sup>-1</sup>  
 134 ( $79.3\text{--}81.0\%$  of 16S  
 135 genes) during the  
 136 incubation (Table 2).

**Table 2** Quantification of bacterial and thaumarchaeal 16S rRNA genes via qPCR for selected experiments with enrichment cultures. NO<sub>2</sub><sup>-</sup> accumulation in these experiments is shown in Fig. 1 A, C.

| Strain | Substrate                                 | Nutrients | Time (d) | 16S rRNA genes mL <sup>-1</sup> |                   |                  |
|--------|-------------------------------------------|-----------|----------|---------------------------------|-------------------|------------------|
|        |                                           |           |          | Bacterial                       | Thaumarchaeal     | % Thaumarchaeota |
| D3C    | All D3C treatments                        | Fig. 1 A  | Inoculum | $1.5 \times 10^7$               | $9.4 \times 10^7$ | 86.3             |
| NF5    | All NF5 treatments                        | Fig. 1 A  | Inoculum | $6.7 \times 10^6$               | $7.5 \times 10^7$ | 91.8             |
| NF5    | NH <sub>4</sub> <sup>+</sup>              | Fig. 1 A  | 8        | $7.8 \times 10^6$               | $5.8 \times 10^7$ | 88.1             |
| NF5    | NH <sub>4</sub> <sup>+</sup>              | Fig. 1 A  | 8        | $6.6 \times 10^6$               | $6.5 \times 10^7$ | 90.9             |
| NF5    | Putrescine + NH <sub>4</sub> <sup>+</sup> | Fig. 1 A  | 37       | $4.5 \times 10^8$               | $1.2 \times 10^8$ | 20.7             |
| NF5    | Putrescine + NH <sub>4</sub> <sup>+</sup> | Fig. 1 A  | 37       | $1.4 \times 10^8$               | $3.4 \times 10^7$ | 19.0             |
| D3C    | All D3C treatments                        | Fig. 1 C  | Inoculum | $1.5 \times 10^6$               | $1.3 \times 10^7$ | 94.2             |
| D3C    | NH <sub>4</sub> <sup>+</sup>              | Fig. 1 C  | 8        | $8.7 \times 10^5$               | $1.4 \times 10^7$ | 96.6             |
| D3C    | NH <sub>4</sub> <sup>+</sup>              | Fig. 1 C  | 8        | $1.3 \times 10^6$               | $1.5 \times 10^7$ | 95.5             |
| D3C    | Urea                                      | Fig. 1 C  | 8        | $1.3 \times 10^6$               | $7.3 \times 10^6$ | 91.9             |
| D3C    | Urea                                      | Fig. 1 C  | 8        | $1.7 \times 10^6$               | $7.9 \times 10^6$ | 90.1             |
| D3C    | Urea                                      | Fig. 1 C  | 14       | $1.1 \times 10^6$               | $3.4 \times 10^7$ | 98.4             |
| D3C    | Urea                                      | Fig. 1 C  | 14       | $1.2 \times 10^6$               | $3.7 \times 10^7$ | 98.4             |
| D3C    | Urea                                      | Fig. 1 C  | 18       | $1.1 \times 10^6$               | $3.1 \times 10^7$ | 98.3             |
| D3C    | Urea                                      | Fig. 1 C  | 18       | $1.3 \times 10^6$               | $4.0 \times 10^7$ | 98.3             |
| D3C    | Putrescine                                | Fig. 1 C  | 8        | $1.0 \times 10^6$               | $6.1 \times 10^6$ | 91.4             |
| D3C    | Putrescine                                | Fig. 1 C  | 8        | $1.8 \times 10^6$               | $8.9 \times 10^6$ | 90.9             |
| D3C    | Putrescine                                | Fig. 1 C  | 14       | $1.2 \times 10^6$               | $8.6 \times 10^6$ | 93.6             |
| D3C    | Putrescine                                | Fig. 1 C  | 14       | $1.1 \times 10^6$               | $8.3 \times 10^6$ | 93.6             |
| D3C    | Putrescine                                | Fig. 1 C  | 18       | $3.6 \times 10^6$               | $1.2 \times 10^7$ | 87.0             |
| D3C    | Putrescine                                | Fig. 1 C  | 18       | $1.4 \times 10^6$               | $1.4 \times 10^7$ | 95.0             |
| NF5    | All NF5 treatments                        | Fig. 1 C  | Inoculum | $1.5 \times 10^6$               | $1.6 \times 10^7$ | 95.1             |
| NF5    | NH <sub>4</sub> <sup>+</sup>              | Fig. 1 C  | 8        | $1.0 \times 10^6$               | $1.4 \times 10^7$ | 96.1             |
| NF5    | NH <sub>4</sub> <sup>+</sup>              | Fig. 1 C  | 8        | $1.5 \times 10^6$               | $1.5 \times 10^7$ | 94.8             |
| NF5    | Putrescine                                | Fig. 1 C  | 8        | $1.6 \times 10^6$               | $6.4 \times 10^6$ | 89.1             |
| NF5    | Putrescine                                | Fig. 1 C  | 8        | $1.6 \times 10^6$               | $5.9 \times 10^6$ | 88.3             |
| NF5    | Putrescine                                | Fig. 1 C  | 14       | $1.0 \times 10^6$               | $7.2 \times 10^6$ | 93.6             |
| NF5    | Putrescine                                | Fig. 1 C  | 14       | $1.1 \times 10^6$               | $7.7 \times 10^6$ | 93.2             |
| NF5    | Putrescine                                | Fig. 1 C  | 18       | $3.0 \times 10^6$               | $9.7 \times 10^6$ | 86.7             |
| NF5    | Putrescine                                | Fig. 1 C  | 18       | $2.5 \times 10^6$               | $1.1 \times 10^7$ | 89.8             |

## 140 ISOTOPE EXPERIMENTS

141 Both axenic *Nitrosopumilus* strains oxidized 100  $\mu\text{M}$   $\text{NH}_3$  to  $\text{NO}_2^-$  within 6 days. When  
142 1.25  $\mu\text{M}$   $^{15}\text{N-NH}_4^+$  was added to the growth media containing 100  $\mu\text{M}$  unlabeled  $\text{NH}_4^+$ , all of the  
143  $^{15}\text{N}$  was converted to  $^{15}\text{N-NO}_2^-$  by stationary phase (NF5: 1.20  $^{15}\text{N-NO}_2^-$   $\mu\text{M}$  produced; D3C:  
144 1.09  $\mu\text{M}$ ; Fig. 2). Oxidation of polyamine-N was tested by adding  $^{15}\text{N}$ -labeled 1,2-diaminoethane  
145 (DAE), 1,3-diaminopropane (DAP), or PUT to the growth media. L-GLU was used as a control  
146 for remineralization, given its rapid catabolism and  $\text{NH}_4^+$  remineralization by marine  
147 heterotrophs (Hollibaugh, 1978; Goldman *et al.*, 1987; Goldman and Dennett, 1991). Growth  
148 with  $^{15}\text{N}$ -labeled DAE, DAP, or GLU did not produce  $^{15}\text{N-NO}_2^-$ , with values similar to the  
149 negative control ( $^{14}\text{N-NH}_4^+$  amendment, no added  $^{15}\text{N}$ ). During growth with  $^{15}\text{N-PUT}$ , ~35% of  
150 the added  $^{15}\text{N}$  was oxidized to  $^{15}\text{N-NO}_2^-$  as  $\text{NH}_3$  was consumed (NF5: 0.45  $^{15}\text{N-NO}_2^-$   $\mu\text{M}$   
151 produced; D3C: 0.43  $\mu\text{M}$ ; Fig. 2).

**Fig. 2**  $^{15}\text{N-NO}_2^-$  production from  $^{15}\text{N}$ -labeled organic N compounds during growth of axenic cultures of *N. piranensis* D3C (circles) and *N. adriaticus* NF5 (diamonds) on  $\text{NH}_3$ . Gray points show total  $\text{NO}_2^-$  ( $^{14}\text{N}$  and  $^{15}\text{N}$ ; right y-axis) while points with color show concomitant production of  $^{15}\text{N-NO}_2^-$  (left y-axis). All points represent the midpoint of duplicate incubation bottles, with error bars representing the range. The  $^{14}\text{N-NH}_4^+$  treatment was a negative control containing no added  $^{15}\text{N}$ .

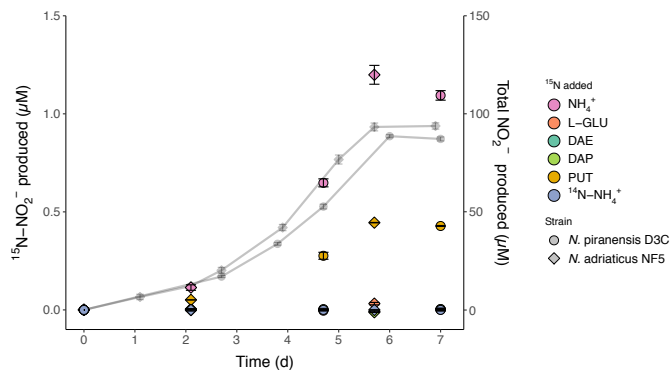

152 To test whether this  $^{15}\text{N-PUT}$  oxidation was due to abiotic reactions with short-lived  
153 reactive metabolic intermediates,  $^{15}\text{N-PUT}$  was incubated in filtered-sterilized, oligotrophic  
154 seawater or filtered-sterilized SCM dosed with nitric oxide ( $\text{NO}$ ), peroxyxynitrite ( $\text{ONOO}^-$ ), or  
155 hydrogen peroxide ( $\text{H}_2\text{O}_2$ ). Amendment with only  $\text{NO}_2^-$  or PUT provided controls with no  
156 reactive compounds (Fig. 3 F). There was no significant difference in  $\delta^{15}\text{N}_{\text{NO}_x}$  values between



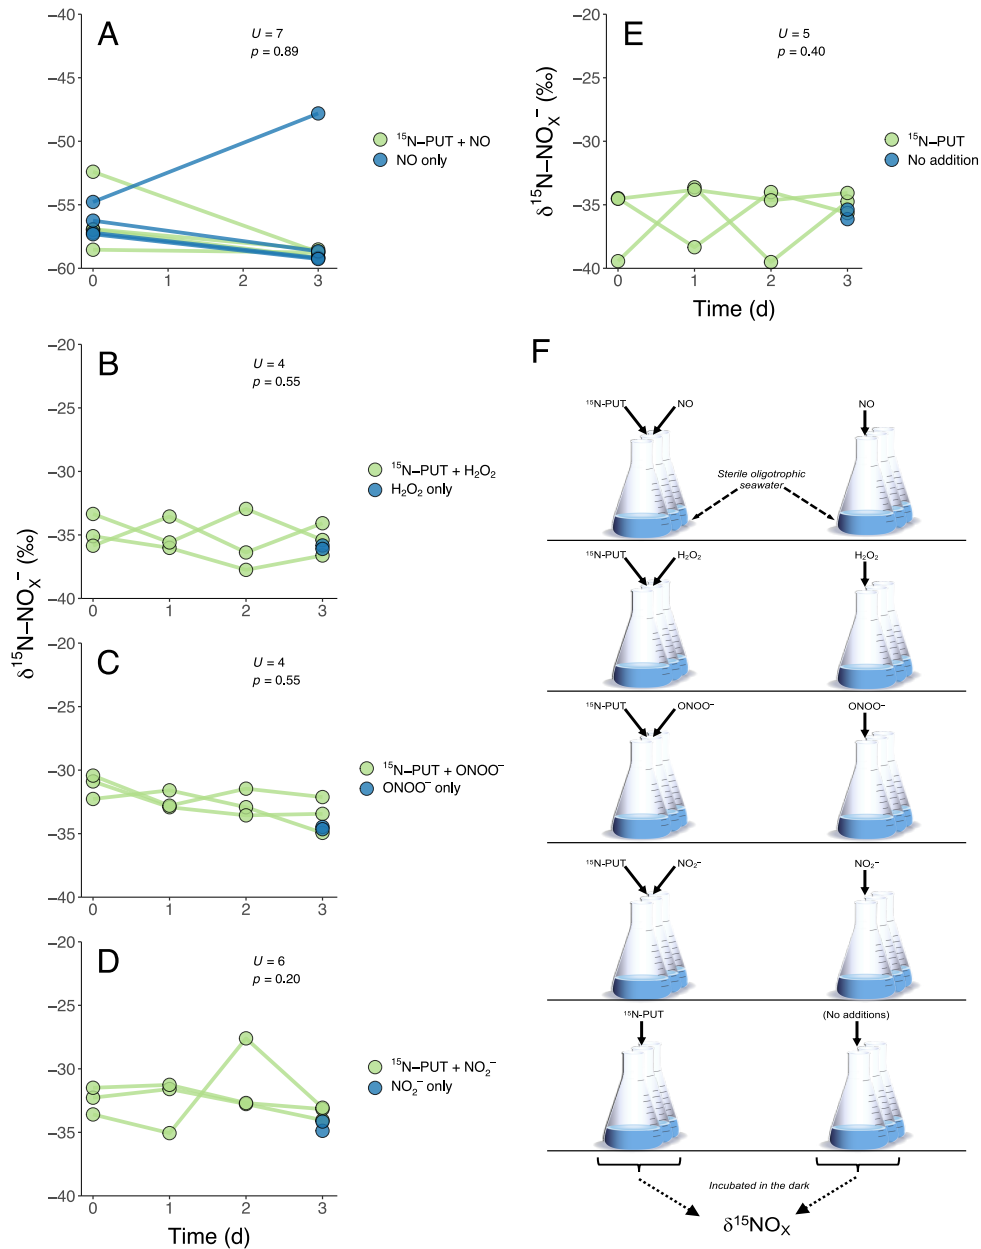

**Fig. 3 A-E)**  $\delta^{15}\text{NO}_x$  (‰) over time in abiotic incubations containing  $^{15}\text{N}$ -labeled PUT and a single reactive compound (blue) or a reactive compound only (green). Results of a Mann-Whitney  $U$ -test are shown in each panel. **F)** Schematic of abiotic incubation experiments. The left column shows treatments including  $^{15}\text{N}$ -labeled PUT and a reactive compound while the right column shows control treatments containing a reactive compound and no  $^{15}\text{N}$ -labeled PUT.

157 incubations of culture medium or filtered seawater receiving  $\text{NO}$  additions ( $U=26$ ,  $p=0.574$ );  
 158 therefore,  $\text{NO}$  addition experiments using either matrix were combined in data analyses.  
 159 There was no significant difference in the ratio of  $^{15}\text{N}/^{14}\text{N}$  in the nitrate plus nitrite ( $\text{NO}_x$ ) pool  
 160 ( $\delta^{15}\text{N}_{\text{NO}_x}$ ) at the termination of any of the incubations containing  $^{15}\text{N}$ -PUT versus those without

161  $^{15}\text{N}$ -PUT (Mann-Whitney  $U$ -tests, all  $p \geq 0.2$ ; Fig. 3 A-E). Furthermore, there was no increase in  
162  $\delta^{15}\text{N}_{\text{NO}_x}$  values when NO gas was directly mixed with a variety of  $^{15}\text{N}$ -labeled polyamines, L-  
163 GLU, or  $\text{NH}_4^+$  in sterile oligotrophic seawater (Mann-Whitney  $U$ -test,  $p=0.64$ ; Fig. 4).  $\text{NO}_2^-$  in  
164 NO-amended incubation endpoints was likely  
165 produced via spontaneous NO oxidation (Lewis and  
166 Deen, 1994), as  $\text{NO}_2^-$  was not detectable in  
167 incubations without added NO (regardless of  $^{15}\text{N}$   
168 addition). Therefore,  $\text{NO}_2^-$  concentration in  
169 incubation endpoints likely reflects the concentration  
170 of the initial NO amendment, and was fairly well  
171 correlated to  $\delta^{15}\text{N}_{\text{NO}_x}$  values (Spearman's  $\rho = -0.70$ ,  
172  $p=0.02$ ; Fig. 4).

173

## 174 DISCUSSION

### 175 *Organic N oxidation by Thaumarchaeota relies on remineralization*

176 Polyamines are ubiquitous in cells (Tabor and Tabor, 1985; Nishibori and Nishijima,  
177 2004; Liu *et al.*, 2016) and highly labile in aqueous environments (Lu *et al.*, 2015; Liu *et al.*,  
178 2015; Krempaska *et al.*, 2017; Madhuri *et al.*, 2019). The amine groups at the ends of  
179 polyamines are essentially  $\text{NH}_3$  with an aliphatic C chain substituted for a hydrogen, and since  
180 their  $\text{pK}_a$  values ( $\sim 10.5$ , depending on chain length and temperature) are close to that of  $\text{NH}_3$   
181 ( $\sim 9.25$ ), they are similarly protonated in seawater. Thus, recent field evidence of rapid oxidation  
182 of polyamine-N in *Thaumarchaeota*-rich ocean waters (Damashek *et al.*, 2019a) begs the  
183 question of whether these archaea can use polyamine-N directly as an energy source.

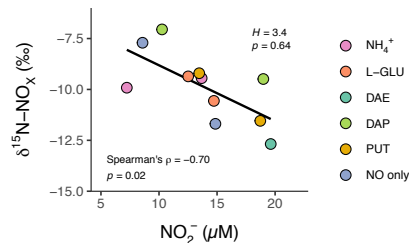

**Fig. 4**  $\delta^{15}\text{N}_{\text{NO}_x}$  (‰) as a function of  $\text{NO}_2^-$  concentration following 24 hours of abiotic incubation of sterile seawater amended with  $^{15}\text{N}$ -labeled compounds and NO gas. NO (1% in  $\text{N}_2$ ) was directly bubbled into seawater. Color denotes  $^{15}\text{N}$  addition. Results of a Kruskal-Wallis test (comparing  $\delta^{15}\text{N}_{\text{NO}_x}$  between treatment groups) and Spearman's correlation coefficient are shown.  $\text{NO}_2^-$  in these incubation endpoints was likely due to abiotic NO oxidation and therefore reflects the amount of added NO.

184 We tested this hypothesis using two *Nitrosopumilus* strains phylogenetically similar to  
185 the *Thaumarchaeota* typical of South Atlantic Bight inshore waters (Hollibaugh *et al.*, 2011;  
186 Hollibaugh *et al.*, 2014; Liu *et al.*, 2018; Damashek *et al.*, 2019b), where previously-measured  
187 polyamine-N oxidation rates were high (Damashek *et al.*, 2019a). Efforts to grow *N. piranensis*  
188 D3C and *N. adriaticus* NF5 with single polyamines as their sole energy source conclusively  
189 demonstrated that they cannot grow by oxidizing N from PUT or other common polyamines  
190 (Fig. S1). Previous experiments with the same strains found only minimal [<sup>3</sup>H]leucine  
191 incorporation, particularly when archaea were starved of NH<sub>3</sub>, similarly suggesting no ability to  
192 use leucine as a carbon or energy source (Bayer *et al.*, 2019a). There is long-standing  
193 biogeochemical and genomic evidence that some marine *Thaumarchaeota* may use some organic  
194 compounds as C sources (e.g., Ouverney and Fuhrman, 2000; Teira *et al.*, 2004; Swan *et al.*,  
195 2014; Seyler *et al.*, 2018; Dekas *et al.*, 2019), and potentially even as an energy source (in  
196 addition to NH<sub>3</sub>; Dekas *et al.*, 2019). As with polyamines, we found no evidence of growth by  
197 either *Nitrosopumilus* strain on a wide variety of common amino acids, amines, or amides (Table  
198 1; Fig. S1). This suggests that NH<sub>3</sub>, urea, and cyanate remain the only known growth substrates  
199 of marine *Thaumarchaeota*.

200 The lack of evidence for direct oxidation of DON-N by pure cultures suggests that  
201 observed rates of DON-N oxidation (and potentially assimilation) by *Thaumarchaeota* in mixed  
202 communities are not a consequence of direct oxidation by *Thaumarchaeota* alone, but instead  
203 couple heterotrophic DON-N remineralization to NH<sub>4</sub><sup>+</sup> with subsequent thaumarchaeal oxidation  
204 of this newly-produced NH<sub>4</sub><sup>+</sup>. Strong evidence for this conclusion comes from growth  
205 experiments with enrichment cultures: the presence of a heterotrophic bacterium led to a  
206 substantial accumulation of NO<sub>2</sub><sup>-</sup> in the medium and an increase in the abundance of bacterial

207 16S rRNA genes, especially when cultures were amended with both PUT and  $\text{NH}_4^+$  (Fig. 1;  
208 Table 2). In contrast, pure cultures of the same *Thaumarchaeota* were unable to oxidize N  
209 supplied as PUT in the absence of  $\text{NH}_3$  (Fig. S1). In addition to indicating a reliance of  
210 thaumarchaeal DON-N oxidation on external remineralization, these findings may have similar  
211 implications for experiments measuring DON assimilation by *Thaumarchaeota* in mixed  
212 communities.

213 Polyamines are highly labile and energy-rich, as their backbone contains multiple fully-  
214 reduced C atoms. It is not surprising that adding this rich C source led to rapid bacterial growth  
215 in enrichment cultures, similar to the stimulation of heterotrophic communities documented in  
216 field studies (Mou *et al.*, 2011; Mou *et al.*, 2015). Notably, the C:N ratio of PUT (2) is lower  
217 than that of natural marine microbial cells (typically ~4-5; Goldman *et al.*, 1987; White *et al.*,  
218 2019), suggesting PUT catabolism by marine bacteria will lead to production of excess  $\text{NH}_4^+$   
219 (Hollibaugh, 1978; Goldman and Dennett, 1991). Therefore,  $\text{NO}_2^-$  production in enrichment  
220 cultures could result from bacterial catabolism of PUT, followed by oxidation of the resulting  
221  $\text{NH}_4^+$  by *Thaumarchaeota*, typically leading to slow and linear  $\text{NO}_2^-$  accumulation (Fig. 1). The  
222 occasional rapid accumulation of  $\text{NO}_2^-$  when  $\text{NH}_4^+$  was added alongside PUT (Fig. 1 A) may  
223 indicate the bacterium in this enrichment was unable to use PUT alone as an N source (i.e.,  
224 needed free  $\text{NH}_4^+$  to catabolize PUT), or may suggest bacterial dependence on *Thaumarchaeota*  
225 (growing on the low concentration of  $\text{NH}_3$ ) as a source of nutrients or organic substrates (e.g.,  
226 Doxey *et al.*, 2015; Heal *et al.*, 2018; Bayer *et al.*, 2019b).

227 Since many DON compounds are highly labile C sources, it is imperative to  
228 systematically account for rapid heterotrophic remineralization of N from DON in incubations of  
229 mixed communities before concluding that *Thaumarchaeota* are capable of direct oxidation or

230 assimilation of DON, ideally by using pure cultures to test field hypotheses. Urea is a clear  
231 exception, since pure cultures of some marine *Thaumarchaeota* can grow with urea-N as their  
232 only energy and N source (Qin *et al.*, 2017a; Bayer *et al.*, 2019a). Direct cyanate-N  
233 oxidation/assimilation may also occur in marine *Thaumarchaeota*, but it is unclear how marine  
234 *Thaumarchaeota* could directly oxidize cyanate-N. While pure cultures of *Nitrosopumilus*  
235 *maritimus* SCM1 produced  $^{15}\text{N-NO}_2^-$  when  $^{15}\text{N}$ -cyanate was added to their growth media, this  
236 only happened when they were already growing on  $\text{NH}_3$  (Kitzinger *et al.*, 2019; see discussion  
237 below). The pathway of cyanate oxidation (or  $\text{NH}_4^+$  production from cyanate) is unclear since  
238 their genomes lack canonical cyanase genes (Kitzinger *et al.*, 2019).

239         Of the myriad polyamines, amino acids, amines, and amides we tested as thaumarchaeal  
240 growth substrates, the only compound leading to appreciable  $\text{NO}_2^-$  accumulation was glutamine:  
241 when both axenic strains were supplied with glutamine as their sole energy source, there was a  
242 slow, linear accumulation of  $\text{NO}_2^-$  (Fig. S1). Since the increase in  $\text{NO}_2^-$  concentration over time  
243 did not resemble a growth curve, it is unlikely that the archaea were directly using glutamine-N  
244 as a growth substrate. Although the mechanism is not clear, glutamine was probably slowly  
245 remineralized to  $\text{NH}_4^+$ , which was then oxidized. A simple explanation is abiotic glutamine  
246 deamination, which occurs relatively rapidly in liquid media containing phosphate and  
247 bicarbonate at neutral pH (Gilbert *et al.*, 1949), such as the SCM used here. However, our data  
248 cannot rule out a biological explanation. Glutamine is a common biochemical amino/amido  
249 donor, and *Thaumarchaeota* encode many genes involved in these reactions (e.g., glutamine  
250 amidotransferases or transaminases in amino acid and cofactor biosynthesis pathways; Walker *et al.*  
251 *al.*, 2010; Kerou *et al.*, 2016) as well as a variety of putative amino acid transporters (Offre *et al.*,  
252 2014). If excess glutamine is transported into thaumarchaeal cells, some may be recycled to

253  $\text{NH}_4^+$  for either assimilatory or dissimilatory use. This amino acid “recycling” is common in  
254 energy-starved microbes (Lever *et al.*, 2015) and was recently hypothesized to play a role in  
255 thaumarchaeal survival in deep sea sediments (Kerou *et al.*, 2021). It is possible that energy-  
256 starved *Thaumarchaeota* in our experiment transported glutamine into their cells but were unable  
257 to incorporate it into biomass, so they hydrolyzed the glutamine amide N and shunted the  
258 resulting  $\text{NH}_4^+$  into energy production, leading to slow growth. Direct tests of thaumarchaeal  
259 glutamine uptake and transformation compared to abiotic breakdown in SCM would be needed  
260 to uncover the mechanism behind the slow glutamine oxidation documented here.

261

#### 262 *Potential co-metabolism or abiotic breakdown of polyamines*

263 Although axenic cultures of marine *Nitrosopumilus* were unable to grow using PUT as  
264 their sole energy and N source, the significant fraction of  $^{15}\text{N}$ -PUT oxidized during growth on  
265  $\text{NH}_3$  (Fig. 2), combined with the correlation between PUT-N and  $\text{NH}_3$  oxidation rates in the  
266 ocean (Damashek *et al.* 2019a), suggests PUT may be co-metabolized by the archaeal ammonia  
267 monooxygenase enzyme (AMO) or decomposed by reactive intermediates produced during  $\text{NH}_3$   
268 oxidation (e.g., Martens-Habbena *et al.*, 2015; Kim *et al.*, 2016). Therefore, *Thaumarchaeota* in  
269 environments with high polyamine availability and enough  $\text{NH}_3$  for rapid growth may indirectly  
270 oxidize a significant amount of PUT-N to  $\text{NO}_2^-$  despite their inability to use PUT-N as a direct  
271 energy source, increasing the flux of N from DON into the  $\text{NO}_x$  pool and potentially  
272 contributing to measured PUT-N oxidation rates in the ocean (Damashek *et al.*, 2019a).

273 Co-metabolism of a variety of compounds due to non-specific oxidation by ammonia  
274 monooxygenase is well documented in ammonia-oxidizing bacteria (AOB). Some AOB can, for  
275 example, co-metabolize methane (Hyman and Wood, 1983; Ward, 1987), and some AOB and

276 *Thaumarchaeota* can co-metabolize a variety of organic compounds (e.g., Rasche *et al.*, 1991;  
277 Wright *et al.*, 2020). Furthermore, co-metabolism of some DON compounds has been  
278 documented: two AOB strains and the thaumarchaeote *Nitrososphaera gargensis* can co-  
279 metabolize the tertiary amines mianserin and ranitidine during growth on NH<sub>3</sub> (Men *et al.*,  
280 2016). Given the close structural and chemical similarity between NH<sub>3</sub> and the primary amine  
281 groups on PUT-N, it seems conceivable that archaeal ammonia monooxygenase may similarly be  
282 able to oxidize PUT-N.

283         There has been recent recognition of the role played by reactive metabolic intermediates  
284 (primarily NO and H<sub>2</sub>O<sub>2</sub>) in thaumarchaeal physiology, and of the importance of chemical  
285 transformations catalyzed by these reactive compounds in culture experiments. For example,  
286 pure thaumarchaeal isolates produce H<sub>2</sub>O<sub>2</sub> (Kim *et al.*, 2016; Bayer *et al.*, 2019c) but lack  
287 catalase to facilitate its rapid detoxification. Exposure of isolates or field populations to high  
288 concentrations of H<sub>2</sub>O<sub>2</sub> therefore arrests their growth and activity (Kim *et al.*, 2016; Tolar *et al.*,  
289 2016; Qin *et al.*, 2017b; Bayer *et al.*, 2019c). NO, an obligate intermediate in the archaeal  
290 ammonia oxidation pathway, accumulates during growth of thaumarchaeal cultures (Martens-  
291 Habbena *et al.*, 2015; Kozłowski *et al.*, 2016; Sauder *et al.*, 2016; Hink *et al.*, 2017) and is found  
292 in high concentrations in marine regions with high nitrification rates or abundant  
293 *Thaumarchaeota* (Ward and Zafiriou, 1988; Lutterbeck *et al.*, 2018). NO is a reactive radical that  
294 rapidly forms reactive nitrogen oxide species (RNOS; e.g., NO<sub>2</sub> or N<sub>2</sub>O<sub>3</sub>) upon exposure to O<sub>2</sub> or  
295 superoxide (Wink and Mitchell, 1998). RNOS are highly destructive of many biological  
296 molecules; relevant to our data, RNOS react with primary amines to produce nitrosamines that  
297 are subsequently deaminated to NH<sub>4</sub><sup>+</sup> (Ridnour *et al.*, 2004). These reactions may be a  
298 mechanism for liberating NH<sub>4</sub><sup>+</sup> from polyamines due to NO production during thaumarchaeal

299 growth on  $\text{NH}_3$ . Similarly, reactions of NO with various compounds have been posited to explain  
300 chemical transformations during thaumarchaeal growth: the abiotic reaction between NO and  
301 reduced iron in growth media is thought to form nitrous oxide in cultures (Kozlowski *et al.*,  
302 2016), and NO may react with cobalamin within thaumarchaeal cells, leading to nitrocobalamin  
303 production (Heal *et al.*, 2018).

304         Given the capability of NO-derived RNOS to react with primary amines, speculation  
305 about the reactivity of NO in thaumarchaeal cultures, and the documented ability of polyamines  
306 to scavenge oxygen radicals (Khan *et al.*, 1992; Ha *et al.*, 1998; Chattopadhyay *et al.*, 2003), we  
307 hypothesized that NO produced during  $\text{NH}_3$  oxidation could react abiotically with  $^{15}\text{N}$ -PUT to  
308 produce the  $^{15}\text{N}$ - $\text{NO}_2^-$  we observed (Fig. 2). However, experiments with cell-free artificial media  
309 and sterilized seawater showed no evidence of reaction between NO and  $^{15}\text{N}$ -polyamines (Fig. 3  
310 A, Fig. 4).  $\text{NO}_2^-$  was produced rapidly in treatments with added NO since NO auto-oxidizes to  
311  $\text{NO}_2^-$  and  $\text{H}^+$  in oxic water (Lewis and Deen, 1994), but this  $\text{NO}_2^-$  did not contain the  $^{15}\text{N}$   
312 initially added as  $^{15}\text{N}$ -PUT. The correlation between  $\text{NO}_2^-$  and  $\delta^{15}\text{N}_{\text{NO}_x}$  values shown in Fig. 4  
313 thus reflects the  $\delta^{15}\text{N}$  value of spontaneously oxidized NO, with no apparent  $^{15}\text{N}$  enrichment due  
314 to oxidation of any  $^{15}\text{N}$ -labeled substrates. We then tested whether  $^{15}\text{N}$ -polyamines react with  
315  $\text{H}_2\text{O}_2$  or  $\text{ONOO}^-$  (formed by reacting  $\text{NO}_2^-$  and  $\text{H}_2\text{O}_2$ ; Robinson and Beckman, 2005) to yield  
316  $^{15}\text{N}$ - $\text{NO}_2^-$ , as these reactive compounds are also produced during thaumarchaeal growth (Kim *et*  
317 *al.*, 2016; Heal *et al.* 2018; Bayer *et al.*, 2019b), but found no detectable  $^{15}\text{N}$ - $\text{NO}_2^-$  in these  
318 treatments either (Fig. 3). This suggests that some PUT oxidation seen in field experiments  
319 (Damashek *et al.* 2019a), with mixed cultures (Fig. 1), or during growth on  $\text{NH}_3$  (Fig. 2) may be  
320 explained by enzymatic co-metabolism of PUT, or due to reactions with reactive species that we  
321 did not test (e.g., superoxide or other RNOS compounds).



322 Our isotope experiments were restricted to PUT, DAP, and DAE due to limited  
323 commercial availability of  $^{15}\text{N}$ -labeled polyamines. Of these, only PUT is commonly found in  
324 high concentrations in phytoplankton and bacterial cells or marine waters (Nishibori *et al.*, 2001;  
325 Lu *et al.*, 2014; Liu *et al.*, 2016; Lin and Lin, 2019). It remains unknown whether other common  
326 polyamines (e.g., spermine, spermidine, norspermine, or norspermidine) are comparably  
327 oxidized during thaumarchaeal  $\text{NH}_3$  oxidation. However, the oxidation of cyanate-N by marine  
328 *Thaumarchaeota* may be analogous, given that axenic *N. maritimus* SCM1 cultures only  
329 oxidized  $^{15}\text{N}$ -cyanate while growing on  $\text{NH}_3$  (Kitzinger *et al.*, 2019), comparable to our results  
330 with  $^{15}\text{N}$ -PUT. Kitzinger *et al.* (2019) hypothesized that *N. maritimus* could break down cyanate  
331 extracellularly, since  $^{15}\text{N}$ - $\text{NH}_4^+$  was produced in cultures amended with  $^{15}\text{N}$ -cyanate despite no  
332 known cyanate hydratase genes existing in the *N. maritimus* SCM1 genome. Whether due to  
333 abiotic reactions with metabolic intermediates (intra- or extracellularly), some as yet  
334 undiscovered mechanism of extracellular remineralization, or co-metabolism by ammonia  
335 monooxygenase, the dual evidence of oxidation of PUT-N (Fig. 2) and cyanate (Kitzinger *et al.*,  
336 2019) during thaumarchaeal growth on  $\text{NH}_3$  suggests some DON compounds can be oxidized  
337 indirectly by growing *Thaumarchaeota*, but definitive demonstrations of mechanisms remain  
338 elusive.

339

## 340 CONCLUSIONS

341 Given the ability of *Thaumarchaeota* to grow using reduced N supplied as urea and  
342 cyanate, there has been interest in their potential to access other forms of organic N, spurred by  
343 numerous field studies reporting putative thaumarchaeal DON assimilation or oxidation. Our  
344 experiments with two axenic isolates suggest marine *Thaumarchaeota* cannot directly access N

345 supplied as polyamines, amino acids, amides, or primary amines as an energy source. Inclusion  
346 of a heterotrophic bacterium in enrichment cultures of *Thaumarchaeota* resulted in the oxidation  
347 of PUT-N, demonstrating the importance of DON remineralization to  $\text{NH}_4^+$  by heterotrophs for  
348 *Thaumarchaeota* to oxidize N supplied as DON. Therefore, claims of DON use by  
349 *Thaumarchaeota* in mixed communities must strictly account for heterotrophic remineralization.  
350 Despite lacking the ability to grow on PUT alone, the surprising finding that both pure strains  
351 oxidized  $^{15}\text{N}$  supplied as PUT while growing on  $\text{NH}_3$  suggests some DON may be co-  
352 metabolized or broken down abiotically, possibly mediated by reactive species produced during  
353  $\text{NH}_3$  oxidation. Abiotic experiments ruled out some of the known reactive oxygen and nitrogen  
354 intermediates of thaumarchaeal metabolism as oxidants, but did not identify the mechanism  
355 leading to  $^{15}\text{N}$ -PUT oxidation in cultures. This study suggests that oxidation of most DON-N for  
356 energy conservation by marine *Thaumarchaeota* requires initial DON remineralization to  $\text{NH}_4^+$   
357 by heterotrophs, but also indicates a potential role for co-metabolism or reactive metabolic  
358 byproducts in thaumarchaeal DON-N oxidation.

359

## 360 **EXPERIMENTAL PROCEDURES**

### 361 **GROWTH EXPERIMENTS**

362 Axenic cultures of *Nitrosopumilus piranensis* D3C and *N. adriaticus* NF5 (Bayer *et al.*,  
363 2019a) were grown in SCM amended with an array of single DON compounds as sole energy  
364 and N sources, including  $\text{NH}_4^+$ , urea, amino acids, primary amines (including polyamines), or  
365 amides added to 1 or 0.5 mM final concentration (1 or 2 mM N; Table 1). All treatments were  
366 run in triplicate for each strain and included pyruvate (200  $\mu\text{M}$ ) to scavenge reactive oxygen  
367 species (Kim *et al.*, 2016) and 50  $\mu\text{g}/\text{mL}$  each of streptomycin and kanamycin.  $\text{NH}_4\text{Cl}$  was added

368 to positive controls but was not included in other treatments. Experiments were initiated using a  
369 10% (v/v) transfer of stationary phase cultures (with  $\text{NH}_4^+$  completely consumed) to ensure  
370 against  $\text{NH}_4^+$  carryover. Growth experiments were conducted in the dark at 29°C for ~70 days  
371 and subsampled for  $\text{NO}_2^-$  determination as described above. Culture purity was tested throughout  
372 the duration of the experiment by adding Marine Broth 2216 to aliquots of the culture (10% v/v)  
373 and monitoring for bacterial growth by measuring  $\text{OD}_{600}$ .

374 Growth experiments were also conducted with early enrichment cultures of *N. piranensis*  
375 strain D3C and *N. adriaticus* strain NF5, in which approximately 5-15% of the cells were the  
376 heterotrophic bacterium *Oceanicaulis alexandrii* (Bayer *et al.*, 2016; Bayer *et al.*, 2019c).  
377 Triplicate cultures were grown in SCM containing either 1 mM  $\text{NH}_4^+$ , 1 mM urea, 1 mM PUT,  
378 and 1 mM PUT + 100  $\mu\text{M}$   $\text{NH}_4^+$  as N or energy sources. Experiments were conducted at 29°C in  
379 the dark and subsampled over time for immediate  $\text{NO}_2^-$  determination using standard methods  
380 (Griess reagent; Strickland and Parsons, 1972). In selected rounds of these experiments,  
381 subsamples were taken for qPCR analysis by mixing 0.8 mL of a culture with 0.8 mL 2X lysis  
382 buffer (1.5 M sucrose, 80 mM EDTA, 100 mM Tris; pH 8.3) and freezing immediately at -80°C.  
383 DNA was extracted using standard phenol/chloroform techniques (Tolar *et al.*, 2013; Damashek  
384 *et al.*, 2019a). Bacterial and thaumarchaeal 16S rRNA genes were quantified using primers  
385 BACT1369F/PROK1492R/TM1389F and GI\_334F/GI\_554R/TM519AR (Suzuki *et al.*, 2000),  
386 respectively (see Table S1 for amplification conditions). Reactions were run in triplicate on a  
387 C1000 Touch Thermal Cycler/CFX96 Real-Time System (Bio-Rad) using the Platinum qPCR  
388 SuperMix-UDG (Thermo Fisher). Standard curves consisted of a dilution series of a linearized  
389 plasmid containing a previously-sequenced amplicon.

390

## 391 ISOTOPE EXPERIMENTS

392 The ability of *Thaumarchaeota* to oxidize DON during growth on  $\text{NH}_3$  was assessed  
393 using  $^{15}\text{N}$  isotope tracers (98-99%  $^{15}\text{N}$ , Cambridge Isotope Laboratories). Axenic cultures were  
394 grown on SCM as described above except using 100  $\mu\text{M}$  ammonium chloride and 20  $\mu\text{M}$   
395 pyruvate. Culture purity was tested as described above. Triplicate bottles per substrate were  
396 amended to 1.25  $\mu\text{M}$  of  $^{15}\text{N}$ -labeled substrate: DAE, DAP, PUT, ammonium chloride, L-GLU, or  
397  $^{14}\text{N}$  ammonium chloride (a negative control with no added  $^{15}\text{N}$ ). Both amine groups of DAE,  
398 DAP, and PUT were  $^{15}\text{N}$ -labeled, leading to total  $^{15}\text{N}$  additions of 2.5  $\mu\text{M}$  in these treatments.  
399 Growth was estimated by measuring  $\text{NO}_2^-$  production over time. At multiple timepoints,  
400 subsamples were frozen at  $-80^\circ\text{C}$  in polypropylene tubes for isotopic analysis.

401  $\delta^{15}\text{NO}_x$  values were measured using the bacterial denitrifier method (Sigman *et al.*,  
402 2001). Briefly,  $\text{NO}_x$  was converted to nitrous oxide by *Pseudomonas aureofaciens* and its N  
403 isotopic ratio was measured using a Finnigan MAT-252 isotope ratio mass spectrometer coupled  
404 with a modified GasBench II interface (Casciotti *et al.*, 2002; Beman *et al.*, 2011; McIlvin and  
405 Casciotti, 2011). The concentration of  $^{15}\text{N}$ - $\text{NO}_2^-$  ( $\mu\text{M}$ ) was calculated by multiplying the  $\text{NO}_x$   
406 atom fraction  $^{15}\text{N}$  by the  $\text{NO}_2^-$  concentration (nitrate was not detectable).

407 Abiotic oxidation of  $^{15}\text{N}$ -PUT by multiple reactive compounds was tested by amending  
408 triplicate flasks containing 75 mL of 0.22- $\mu\text{m}$  filtered aged surface water from the Gulf Stream  
409 or Station ALOHA ( $\text{NH}_4^+$  and  $\text{NO}_x$  below the limit of detection), or sterile SCM, with  $^{15}\text{N}$ -PUT  
410 and a single reactive compound ( $\text{NO}$ ,  $\text{H}_2\text{O}_2$ , or  $\text{ONOO}^-$ ; Fig. 3 F). Flasks were then incubated at  
411  $23^\circ\text{C}$  in the dark. Two control treatments were run that did not contain reactive compounds: one  
412 amended with  $\text{NO}_2^-$ , and one with no addition. For each treatment (including the two negative  
413 controls), parallel replicated incubations were conducted with and without added  $^{15}\text{N}$ -PUT (Fig.

414 3 F). NO was generated from the NO donor (Z)-1-[N-(3-aminopropyl)-N-(n-  
415 propyl)amino]diazene-1,2-diolate (PAPA NONOate; Cayman Chemical, Ann Arbor). 100  
416  $\mu\text{M}$  of PAPA NONOate was added to each flask to produce 200  $\mu\text{M}$  NO (Hrabie *et al.*, 1993).  
417 The PAPA NONOate stock was prepared by slowly injecting 5.7 mL 0.01 M NaOH into an  
418 airtight vial containing 50 mg PAPA NONOate. This stock was wrapped in foil and stored at 4°C  
419 prior to use within hours. NO addition experiments were also conducted using blank SCM media  
420 (no added N, as described above). In  $\text{H}_2\text{O}_2$  (Millipore Sigma, Burlington, MA),  $\text{ONOO}^-$ ,  $\text{NO}_2^-$ ,  
421 and no addition control treatments, 1  $\mu\text{M}$  of the respective compound was added to flasks  
422 containing 100 nM  $^{15}\text{N}$ -PUT, while NO treatment flasks contained 1.25  $\mu\text{M}$   $^{15}\text{N}$ -PUT.  $\text{ONOO}^-$   
423 was generated by mixing  $\text{NO}_2^-$  and  $\text{H}_2\text{O}_2$  (Robinson and Beckman, 2005). At the beginning and  
424 end of each incubation, subsamples were frozen at -80°C for  $\delta^{15}\text{NO}_x$  determination (as described  
425 above). Twenty  $\mu\text{M}$  sodium nitrate with a known  $\delta^{15}\text{N}_{\text{NO}_x}$  value was added to samples prior to  
426 conversion of  $\text{NO}_x$  to nitrous oxide to enable isotopic measurements in experiments with no  
427  $\text{NO}_2^-$  accumulation ( $\text{H}_2\text{O}_2$ ,  $\text{ONOO}^-$ ,  $\text{NO}_2^-$ , and no addition control).

428 In tests of the oxidative ability of NO on multiple  $^{15}\text{N}$ -labeled compounds, NO gas (1%  
429 v/v in  $\text{N}_2$ ; Airgas, Radnor Township, PA) was directly bubbled through a syringe into  
430 Erlenmeyer flasks containing filtered aged surface water from the Gulf Stream ( $\text{NH}_4^+$  and  $\text{NO}_x$   
431 below the limit of detection).  $^{15}\text{N}$ -labeled  $\text{NH}_4^+$ , L-GLU, DAE, DAP, and PUT were added to  
432 duplicate flasks (as well as a negative control with no added  $^{15}\text{N}$ ) and incubated at 23°C in the  
433 dark. After 24 hours, subsamples were frozen at -80°C for  $\delta^{15}\text{NO}_x$  determination (as described  
434 above).

435

436 DATA ANALYSIS

437 Mann-Whitney  $U$ -tests were conducted using R (R Core Team, 2019) to determine  
438 whether  $\delta^{15}\text{NO}_x$  values differed between abiotic incubation endpoints of treatments with and  
439 without  $^{15}\text{N}$ -PUT (shown in Fig. 3) and between abiotic incubation endpoints of treatments  
440 containing different  $^{15}\text{N}$ -labeled substrates (shown in Fig. 4). Correlations were determined by  
441 calculating Spearman's rank correlation coefficient ( $\rho$ ) in R. Plots were made using the ggplot2  
442 R package (Wickham, 2016).

443

#### 444 ACKNOWLEDGMENTS

445 This work was funded by NSF OCE grants 1538677 (to JTH) and 1537995 (to BNP). BB  
446 was supported by the Uni:docs Fellowship of the University of Vienna. A contribution number  
447 from the University of Hawai'i School of Earth Science and Technology will be provided upon  
448 manuscript acceptance. The authors declare no conflicts of interest.

449

#### 450 REFERENCES

- 451 Alonso-Saez, L., Waller, A.S., Mende, D.R., Bakker, K., Farnelid, H., Yager, P.L., et al. (2012) Role for urea in  
452 nitrification by polar marine Archaea. *Proc Natl Acad Sci* **109**: 17989–17994.
- 453 Bayer, B., Vojvoda, J., Offre, P., Alves, R.J.E., Elisabeth, N.H., Garcia, J.A., et al. (2016) Physiological and  
454 genomic characterization of two novel marine thaumarchaeal strains indicates niche differentiation. *ISME J* **10**:  
455 1051–1063.
- 456 Bayer, B., Vojvoda, J., Reinthaler, T., Reyes, C., Pinto, M., and Herndl, G.J. (2019a) *Nitrosopumilus adriaticus* sp.  
457 nov. and *Nitrosopumilus piranensis* sp. nov., two ammonia-oxidizing archaea from the Adriatic Sea and  
458 members of the class *Nitrososphaeria*. *Int J Sys Evol Microbiol* **69**: 1892–1902.
- 459 Bayer, B., Hansman, R.L., Bittner, M.J., Noriega-Ortega, B.E., Niggemann, J., Dittmar, T., and Herndl, G.J. (2019b)  
460 Ammonia-oxidizing archaea release a suite of organic compounds potentially fueling prokaryotic heterotrophy  
461 in the ocean. *Environ Microbiol* **21**: 4062–4075.
- 462 Bayer, B., Pelikan, C., Bittner, M.J., Reinthaler, T., Könneke, M., Herndl, G.J., and Offre, P. (2019c) Proteomic  
463 response of three marine ammonia-oxidizing archaea to hydrogen peroxide and their metabolic interactions  
464 with a heterotrophic alphaproteobacterium. *mSystems* **4**: e00181–19.
- 465 Beman, J.M., Chow, C.-E., King, A.L., Feng, Y., Fuhrman, J.A., Andersson, A., et al. (2011) Global declines in  
466 oceanic nitrification rates as a consequence of ocean acidification. *Proc Natl Acad Sci* **108**: 208–213.
- 467 Carini, P., Dupont, C.L., and Santoro, A.E. (2018) Patterns of thaumarchaeal gene expression in culture and diverse  
468 marine environments. *Environ Microbiol* **20**: 2112–2124.
- 469 Casciotti, K.L., Sigman, D.M., Hastings, M.G., Böhlke, J.K., and Hilkert, A. (2002) Measurement of the oxygen  
470 isotopic composition of nitrate in seawater and freshwater using the denitrifier method. *Anal Chem* **74**: 4905–  
471 4912.
- 472 Chattopadhyay, M.K., Tabor, C.W., and Tabor, H. (2003) Polyamines protect *Escherichia coli* cells from the toxic  
473 effect of oxygen. *Proc Natl Acad Sci* **100**: 2261–2265.

- 474 Damashek, J., Tolar, B.B., Liu, Q., Okotie Oyekan, A.O., Wallsgrove, N.J., Popp, B.N., and Hollibaugh, J.T.  
475 (2019a) Microbial oxidation of nitrogen supplied as selected organic nitrogen compounds in the South Atlantic  
476 Bight. *Limnol Oceanogr* **64**: 982–995.
- 477 Damashek, J., Edwardson, C.F., Tolar, B.B., Gifford, S.M., Moran, M.A., and Hollibaugh, J.T. (2019b) Coastal  
478 ocean metagenomes and curated metagenome-assembled genomes from Marsh Landing, Sapelo Island  
479 (Georgia, USA). *Microbiol Resour Announc* **8**: e00934–19.
- 480 Dekas, A.E., Parada, A.E., Mayali, X., Fuhrman, J.A., Wollard, J., Weber, P.K., and Pett-Ridge, J. (2019)  
481 Characterizing chemoautotrophy and heterotrophy in marine archaea and bacteria with single-cell multi-isotope  
482 NanoSIP. *Front Microbiol* **10**: 2682.
- 483 Doxey, A.C., Kurtz, D.A., Lynch, M.D., Sauder, L.A., and Neufeld, J.D. (2015) Aquatic metagenomes implicate  
484 *Thaumarchaeota* in global cobalamin production. *ISME J* **9**: 461–471.
- 485 Francis, C.A., Beman, J.M., and Kuypers, M.M.M. (2007) New processes and players in the nitrogen cycle: the  
486 microbial ecology of anaerobic and archaeal ammonia oxidation. *ISME J* **1**: 19–27.
- 487 Gilbert, J.B., Price, V.E., and Greenstein, J.P. (1949) Effect of anions on the non-enzymatic desamidation of  
488 glutamine. *J Biol Chem* **180**: 209–218.
- 489 Goldman, J.C., Caron, D.A., and Dennett, M.R. (1987) Regulation of gross growth efficiency and ammonium  
490 regeneration in bacteria by substrate C: N ratio. *Limnol Oceanogr* **32**: 1239–1252.
- 491 Goldman, J.C. and Dennett, M.R. (1991) Ammonium regeneration and carbon utilization by marine bacteria grown  
492 on mixed substrates. *Mar Biol* **109**: 369–378.
- 493 Ha, H.C., Sirisoma, N.S., Kuppusamy, P., Zweier, J.L., Woster, P.M., and Casero, R.A. (1998) The natural  
494 polyamine spermine functions directly as a free radical scavenger. *Proc Natl Acad Sci* **95**: 11140–11145.
- 495 Hallam, S.J., Mincer, T.J., Schleper, C., Preston, C.M., Roberts, K., Richardson, P.M., and DeLong, E.F. (2006)  
496 Pathways of carbon assimilation and ammonia oxidation suggested by environmental genomic analyses of  
497 marine *Crenarchaeota*. *PLoS Biol* **4**: e95.
- 498 Heal, K.R., Qin, W., Amin, S.A., Devol, A.H., Moffett, J.W., Armbrust, E.V., et al. (2018) Accumulation of NO<sub>2</sub>-  
499 cobalamin in nutrient-stressed ammonia-oxidizing archaea and in the oxygen deficient zone of the eastern  
500 tropical North Pacific. *Environ Microbiol Rep* **10**: 453–457.
- 501 Hink, L., Lycus, P., Gubry-Rangin, C., Frostegård, Å., Nicol, G.W., Prosser, J.I., and Bakken, L.R. (2017) Kinetics  
502 of NH<sub>3</sub>-oxidation, NO<sub>2</sub>-turnover, N<sub>2</sub>O-production and electron flow during oxygen depletion in model bacterial  
503 and archaeal ammonia oxidisers. *Environ Microbiol* **19**: 4882–4896.
- 504 Hollibaugh, J.T. (1978) Nitrogen regeneration during the degradation of several amino acids by plankton  
505 communities collected near Halifax, Nova Scotia, Canada. *Mar Biol* **45**: 191–201.
- 506 Hollibaugh, J.T., Gifford, S., Sharma, S., Bano, N., and Moran, M.A. (2011) Metatranscriptomic analysis of  
507 ammonia-oxidizing organisms in an estuarine bacterioplankton assemblage. *ISME J* **5**: 866–878.
- 508 Hollibaugh, J.T., Gifford, S.M., Moran, M.A., Ross, M.J., Sharma, S., and Tolar, B.B. (2014) Seasonal variation in  
509 the metatranscriptomes of a Thaumarchaeota population from SE USA coastal waters. *ISME J* **8**: 685–698.
- 510 Hrabie, J.A., Klose, J.R., Wink, D.A., and Keefer, L.K. (1993) New nitric oxide-releasing zwitterions derived from  
511 polyamines. *J Org Chem* **58**: 1472–1476.
- 512 Hyman, M.R. and Wood, P.M. (1983) Methane oxidation by *Nitrosomonas europaea*. *Biochem J* **212**: 31–37.
- 513 Kerou, M., Offre, P., Valledor, L., Abby, S.S., Melcher, M., Nagler, M., et al. (2016) Proteomics and comparative  
514 genomics of *Nitrososphaera viennensis* reveal the core genome and adaptations of archaeal ammonia oxidizers.  
515 *Proc Natl Acad Sci* **113**: E7937–E7946.
- 516 Kerou, M., Ponce-Toledo, R.I., Zhao, R., Abby, S.S., Hirai, M., Nomaki, H., et al. (2021) Genomes of  
517 Thaumarchaeota from deep sea sediments reveal specific adaptations of three independently evolved lineages.  
518 *ISME J* <https://doi.org/10.1038/s41396-021-00962-6>.
- 519 Khan, A.U., Mei, Y.H., and Wilson, T. (1992) A proposed function for spermine and spermidine: protection of  
520 replicating DNA against damage by singlet oxygen. *Proc Natl Acad Sci* **89**: 11426–11427.
- 521 Kim, J.-G., Park, S.-J., Sinninghe Damsté, J.S., Schouten, S., Rijpstra, W.I.C., Jung, M.-Y., et al. (2016) Hydrogen  
522 peroxide detoxification is a key mechanism for growth of ammonia-oxidizing archaea. *Proc Natl Acad Sci* **113**:  
523 7888–7893.
- 524 Kirchman, D.L., Elifantz, H., Dittel, A.I., Malmstrom, R.R., and Cottrell, M.T. (2007) Standing stocks and activity  
525 of Archaea and Bacteria in the western Arctic Ocean. *Limnol Oceanogr* **52**: 495–507.
- 526 Kitzinger, K., Padilla, C.C., Marchant, H.K., Hach, P.F., Herbold, C.W., Kidane, A.T., et al. (2019) Cyanate and  
527 urea are substrates for nitrification by Thaumarchaeota in the marine environment. *Nat Microbiol* **4**: 234–243.



- 528 Kozłowski, J.A., Stieglmeier, M., Schleper, C., Klotz, M.G., and Stein, L.Y. (2016) Pathways and key intermediates  
529 required for obligate aerobic ammonia-dependent chemolithotrophy in bacteria and Thaumarchaeota. *ISME J*  
530 **10**: 1836–1845.
- 531 Könneke, M., Bernhard, A.E., de la Torre, J.R., Walker, C.B., Waterbury, J.B., and Stahl, D.A. (2005) Isolation of  
532 an autotrophic ammonia-oxidizing marine archaeon. *Nature* **437**: 543–546.
- 533 Krempaska, N., Horňák, K., and Pernthaler, J. (2017) Spatiotemporal distribution and microbial assimilation of  
534 polyamines in a mesotrophic lake. *Limnol Oceanogr* **63**: 816–832.
- 535 Laperriere, S.M., Morando, M., Capone, D.G., Gunderson, T., Smith, J.M., and Santoro, A.E. (2021) Nitrification  
536 and nitrous oxide dynamics in the Southern California Bight. *Limnol Oceanogr* **66**: 1099–1112.
- 537 Lee, C. and Jørgensen, N.O.G. (1995) Seasonal cycling of putrescine and amino acids in relation to biological  
538 production in a stratified coastal salt pond. *Biogeochemistry* **29**: 131–157.
- 539 Lever, M.A., Rogers, K.L., Lloyd, K.G., Overmann, J., Schink, B., Thauer, R.K., et al. (2015) Life under extreme  
540 energy limitation: a synthesis of laboratory- and field-based investigations. *FEMS Microbiol Rev* **39**: 688–728.
- 541 Lewis, R.S. and Deen, W.M. (1994) Kinetics of the reaction of nitric oxide with oxygen in aqueous solutions. *Chem*  
542 *Res Toxicol* **7**: 568–574.
- 543 Lin, H.-Y. and Lin, H.-J. (2019) Polyamines in microalgae: something borrowed, something new. *Mar Drugs* **17**: 1.
- 544 Liu, Q., Lu, X., Tolar, B.B., Mou, X., and Hollibaugh, J.T. (2015) Concentrations, turnover rates and fluxes of  
545 polyamines in coastal waters of the South Atlantic Bight. *Biogeochemistry* **123**: 117–133.
- 546 Liu, Q., Nishibori, N., Imai, I., and Hollibaugh, J.T. (2016) Response of polyamine pools in marine phytoplankton to  
547 nutrient limitation and variation in temperature and salinity. *Mar Ecol Prog Ser* **544**: 93–105.
- 548 Liu, Q., Tolar, B.B., Ross, M.J., Cheek, J.B., Sweeney, C.M., Wallsgrave, N.J., et al. (2018) Light and temperature  
549 control the seasonal distribution of thaumarchaeota in the South Atlantic bight. *ISME J* **12**: 1473–1485.
- 550 Lu, X., Zou, L., Clevinger, C., Liu, Q., Hollibaugh, J.T., and Mou, X. (2014) Temporal dynamics and depth  
551 variations of dissolved free amino acids and polyamines in coastal seawater determined by high-performance  
552 liquid chromatography. *Mar Chem* **163**: 36–44.
- 553 Lu, X., Sun, S., Hollibaugh, J.T., and Mou, X. (2015) Identification of polyamine-responsive bacterioplankton taxa  
554 in South Atlantic Bight. *Environ Microbiol Rep* **7**: 831–838.
- 555 Lutterbeck, H.E., Arévalo-Martínez, D.L., Löscher, C.R., and Bange, H.W. (2018) Nitric oxide (NO) in the oxygen  
556 minimum zone off Peru. *Deep-Sea Res Pt II* **156**: 148–154.
- 557 Madhuri, S., Wang, K., Bade, D., and Mou, X. (2019) Concentration and turnover of dissolved free polyamines on  
558 the South Coast of Lake Erie. *Limnol Oceanogr* **64**: 1641–1650.
- 559 Martens-Habbena, W., Qin, W., Horak, R.E.A., Urakawa, H., Schauer, A.J., Moffett, J.W., et al. (2015) The  
560 production of nitric oxide by marine ammonia-oxidizing archaea and inhibition of archaeal ammonia oxidation  
561 by a nitric oxide scavenger. *Environ Microbiol* **17**: 2261–2274.
- 562 McIlvin, M.R. and Casciotti, K.L. (2011) Technical updates to the bacterial method for nitrate isotopic analyses.  
563 *Anal Chem* **83**: 1850–1856.
- 564 Men, Y., Han, P., Helbling, D.E., Jehmlich, N., Herbold, C., Gulde, R., et al. (2016) Biotransformation of two  
565 pharmaceuticals by the ammonia-oxidizing archaeon *Nitrososphaera gargensis*. *Environ Sci Technol* **50**:  
566 4682–4692.
- 567 Mou, X., Vila-Costa, M., Sun, S., Zhao, W., Sharma, S., and Moran, M.A. (2011) Metatranscriptomic signature of  
568 exogenous polyamine utilization by coastal bacterioplankton. *Environ Microbiol Rep* **3**: 798–806.
- 569 Mou, X., Jacob, J., Lu, X., Vila-Costa, M., Chan, L.-K., Sharma, S., and Zhang, Y.-Q. (2015) Bromodeoxyuridine  
570 labelling and fluorescence-activated cell sorting of polyamine-transforming bacterioplankton in coastal  
571 seawater. *Environ Microbiol* **17**: 876–888.
- 572 Nishibori, N., Yuasa, A., Sakai, M., Fujihara, S., and Nishio, S. (2001) Free polyamine concentrations in coastal  
573 seawater during phytoplankton bloom. *Fish Sci* **67**: 79–83.
- 574 Nishibori, N. and Nishijima, T. (2004) Changes in polyamine levels during growth of a red-tide causing  
575 phytoplankton *Chattonella antiqua* (Raphidophyceae). *Eur J Phycol* **39**: 51–55.
- 576 Offre, P., Kerou, M., Spang, A., and Schleper, C. (2014) Variability of the transporter gene complement in  
577 ammonia-oxidizing archaea. *Trend Microbiol* **22**: 665–675.
- 578 Ouverney, C.C. and Fuhrman, J.A. (2000) Marine planktonic archaea take up amino acids. *Appl Environ Microbiol*  
579 **66**: 4829–4833.
- 580 Palatinszky, M., Herbold, C., Jehmlich, N., Pogoda, M., Han, P., Bergen, von, M., et al. (2015) Cyanate as an energy  
581 source for nitrifiers. *Nature* **524**: 105–108.



- 582 Qin, W., Amin, S.A., Martens-Habbena, W., Walker, C.B., Urakawa, H., Devol, A.H., et al. (2014) Marine  
583 ammonia-oxidizing archaeal isolates display obligate mixotrophy and wide ecotypic variation. *Proc Natl Acad*  
584 *Sci* **111**: 12504–12509.
- 585 Qin, W., Heal, K.R., Ramdasi, R., Kobelt, J.N., Martens-Habbena, W., Bertagnolli, A.D., et al. (2017a)  
586 *Nitrosopumilus maritimus* gen. nov., sp. nov., *Nitrosopumilus cobalaminigenes* sp. nov., *Nitrosopumilus*  
587 *oxyclinae* sp. nov., and *Nitrosopumilus ureiphilus* sp. nov., four marine ammonia-oxidizing archaea of the  
588 phylum *Thaumarchaeota*. *Int J Sys Evol Microbiol* **67**: 5067–5079.
- 589 Qin, W., Meinhardt, K.A., Moffett, J.W., Devol, A.H., Virginia Armbrust, E., Ingalls, A.E., and Stahl, D.A. (2017b)  
590 Influence of oxygen availability on the activities of ammonia-oxidizing archaea. *Environ Microbiol Rep* **9**:  
591 250–256.
- 592 R Core Team (2019) R: A language and environment for statistical computing. R Foundation for Statistical  
593 Computing, Vienna, Austria. <https://www.R-project.org/>.
- 594 Rasche, M.E., Hyman, M.R., and Arp, D.J. (1991) Factors limiting aliphatic chlorocarbon degradation by  
595 *Nitrosomonas europaea*: cometabolic inactivation of ammonia monooxygenase and substrate specificity. *Appl*  
596 *Environ Microbiol* **57**: 2986–2994.
- 597 Ridnour, L.A., Thomas, D.D., Mancardi, D., Espey, M.G., Miranda, K.M., Paolocci, N., et al. (2004) The chemistry  
598 of nitrosative stress induced by nitric oxide and reactive nitrogen oxide species. Putting perspective on stressful  
599 biological situations. *Biol Chem* **385**: 1–10.
- 600 Robinson, K.M. and Beckman, J.S. (2005) Synthesis of peroxyxynitrite from nitrite and hydrogen peroxide. In, Packer,  
601 L. and Cadenas, E. (eds), *Methods in Enzymology*, Vol. 396. Elsevier, pp. 207–214.
- 602 Santoro, A.E., Richter, R.A., and Dupont, C.L. (2019) Planktonic marine archaea. *Annu Rev Mar Sci* **11**: 131–158.
- 603 Sauder, L.A., Ross, A.A., and Neufeld, J.D. (2016) Nitric oxide scavengers differentially inhibit ammonia oxidation  
604 in ammonia-oxidizing archaea and bacteria. *FEMS Microbiol Lett* **363**: fnw052.
- 605 Seyler, L.M., McGuinness, L.M., Gilbert, J.A., Biddle, J.F., Gong, D., and Kerkhof, L.J. (2018) Discerning  
606 autotrophy, mixotrophy and heterotrophy in marine TACK archaea from the North Atlantic. *FEMS Microbiol*  
607 *Ecol* **94**: fiy014.
- 608 Sigman, D.M., Casciotti, K.L., Andreani, M., Barford, C., Galanter, M., and Böhlke, J.K. (2001) A bacterial method  
609 for the nitrogen isotopic analysis of nitrate in seawater and freshwater. *Anal Chem* **73**: 4145–4153.
- 610 Smith, J.M., Damashek, J., Chavez, F.P., and Francis, C.A. (2016) Factors influencing nitrification rates and the  
611 abundance and transcriptional activity of ammonia-oxidizing microorganisms in the dark northeast Pacific  
612 Ocean. *Limnol Oceanogr* **61**: 596–609.
- 613 Stahl, D.A. and de la Torre, J.R. (2012) Physiology and diversity of ammonia-oxidizing archaea. *Annu Rev*  
614 *Microbiol* **66**: 83–101.
- 615 Strickland, J. and Parsons, T.R. (1972) *A Practical Handbook of Seawater Analysis*, 2nd ed. Fisheries Research  
616 Board of Canada, Ottawa.
- 617 Suzuki, M.T., Taylor, L.T., and DeLong, E.F. (2000) Quantitative analysis of small-subunit rRNA genes in mixed  
618 microbial populations via 5'-nuclease assays. *Appl Environ Microbiol* **66**: 4605–4614.
- 619 Swan, B.K., Chaffin, M.D., Martinez-Garcia, M., Morrison, H.G., Field, E.K., Poulton, N.J., et al. (2014) Genomic  
620 and metabolic diversity of Marine Group I Thaumarchaeota in the mesopelagic of two subtropical gyres. *PLoS*  
621 *ONE* **9**: e95380.
- 622 Tabor, C.W. and Tabor, H. (1984) Polyamines. *Annual Review of Biochemistry* **53**: 749–790.
- 623 Tabor, C.W. and Tabor, H. (1985) Polyamines in microorganisms. *Microbiol Rev* **49**: 81–99.
- 624 Teira, E., Reinthaler, T., Pernthaler, A., Pernthaler, J., and Herndl, G.J. (2004) Combining catalyzed reporter  
625 deposition-fluorescence in situ hybridization and microautoradiography to detect substrate utilization by  
626 bacteria and archaea in the deep ocean. *Appl Environ Microbiol* **70**: 4411–4414.
- 627 Teira, E., van Aken, H., Veth, C., and Herndl, G.J. (2006) Archaeal uptake of enantiomeric amino acids in the meso-  
628 and bathypelagic waters of the North Atlantic. *Limnol Oceanogr* **51**: 60–69.
- 629 Tolar, B.B., King, G.M., and Hollibaugh, J.T. (2013) An analysis of Thaumarchaeota populations from the Northern  
630 Gulf of Mexico. *Front Microbiol* **4**: 72.
- 631 Tolar, B.B., Powers, L.C., Miller, W.L., Wallsgrove, N.J., Popp, B.N., and Hollibaugh, J.T. (2016) Ammonia  
632 oxidation in the ocean can be inhibited by nanomolar concentrations of hydrogen peroxide. *Front Mar Sci* **3**:  
633 237.
- 634 Tolar, B.B., Wallsgrove, N.J., Popp, B.N., and Hollibaugh, J.T. (2017) Oxidation of urea-derived nitrogen by  
635 thaumarchaeota-dominated marine nitrifying communities. *Environ Microbiol* **19**: 4838–4850.

- 636 Walker, C.B., de la Torre, J.R., Klotz, M.G., Urakawa, H., Pinel, N., Arp, D.J., et al. (2010) *Nitrosopumilus*  
637 *maritimus* genome reveals unique mechanisms for nitrification and autotrophy in globally distributed marine  
638 crenarchaea. *Proc Natl Acad Sci* **107**: 8818–8823.
- 639 Ward, B.B. (1987) Kinetic studies on ammonia and methane oxidation by . *Arch Microbiol* **147**: 126–133.
- 640 Ward, B.B. and Zafiriou, O.C. (1988) Nitrification and nitric oxide in the oxygen minimum of the eastern tropical  
641 North Pacific. *Deep Sea Res Pt A* **35**: 1127–1142.
- 642 White, A.E., Giovannoni, S.J., Zhao, Y., Vergin, K., and Carlson, C.A. (2019) Elemental content and stoichiometry  
643 of SAR11 chemoheterotrophic marine bacteria. *Limnol Oceanogr Lett* **4**: 44–51.
- 644 Wickham, H. (2016) *ggplot2: Elegant Graphics for Data Analysis* Springer, New York.
- 645 Wink, D.A. and Mitchell, J.B. (1998) Chemical biology of nitric oxide: insights into regulatory, cytotoxic, and  
646 cytoprotective mechanisms of nitric oxide. *Free Radic Biol Med* **25**: 434–456.
- 647 Wright, C.L., Schatteman, A., Crombie, A.T., Murrell, J.C., and Lehtovirta-Morley, L.E. (2020) Inhibition of  
648 ammonia monooxygenase from ammonia-oxidizing archaea by linear and aromatic alkynes. *Appl Environ*  
649 *Microbiol* **86**: e02388–19.
- 650 Yakimov, M.M., La Cono, V., Smedile, F., DeLuca, T.H., Juárez, S., Ciordia, S., et al. (2011) Contribution of  
651 crenarchaeal autotrophic ammonia oxidizers to the dark primary production in Tyrrhenian deep waters (Central  
652 Mediterranean Sea). *ISME J* **5**: 945–961.

653  
654

## 655 SUPPLEMENTAL TABLES AND FIGURES

### 656 Table S1

657 Primers, cycling information, and assay data for qPCR reactions

658

659 **Fig. S1** NO<sub>2</sub><sup>-</sup> accumulation in axenic cultures of *N. piranensis* D3C (circles) and *N. adriaticus*  
660 NF5 (diamonds) over time. Colors denote the compounds added to the media as sole energy and  
661 N sources. Points show the average of triplicate incubation bottles while error bars show  
662 standard deviation.

663
